# Supplementary material for: Melatonin ameliorates myocardial injury by reducing apoptosis and autophagy of cardiomyocytes in a rat cardiopulmonary bypass model
Source: PeerJ. 2021 Apr 15;9:e11264. doi: 10.7717/peerj.11264 (PMC8053380; doi:10.7717/peerj.11264)
Supplement: Supplemental Information 6 [file peerj-09-11264-s006.xls]

## Sheet: Figs. 2 A-C
Plasma IL-6	SO1	SO2	SO3	SO4	SO5	SO6	CPB1	CPB2	CPB3	CPB4	CPB5	CPB6	MEL1	MEL2	MEL3	MEL4	MEL5	MEL6
T0	1.23102	1.84251	2.15234	1.84251	1.07985	0.630441	1.38287	1.23102	1.482	1.23102	8.01573	1.11335	1.23	0.48	0.93	0.48	0.63	0.67
T1	1.38287	1.07985	0.929367	1.68861	0.630441	1.07985	0.779563	1.84251	4.3975	3.58032	9.28861	6.67748	1.84251	1.5354	0.482	1.23102	1.07985	0.78496
T2	0.630441	1.5354	1.38287	1.84251	0.929367	0.482	64.9815	124.553	155.74	220.463	213.145	170.486	1.99708	112.991	133.873	72.0923	111.738	69.7754
Plasma IL-1β	SO1	SO2	SO3	SO4	SO5	SO6	CPB1	CPB2	CPB3	CPB4	CPB5	CPB6	MEL1	MEL2	MEL3	MEL4	MEL5	MEL6
T0	9.12984	17.0177	0.695479	2.91897	1.80611	7.39268	8.51669	4.03405	2.36226	5.88029	9.07952	0.141	2.91897	1.25051	20.4533	0.141	0.141	1.80611
T1	8.51669	21.0278	3.85885	7.95441	1.25051	7.95441	13.6023	9.64292	4.03405	7.45871	6.83152	4.03405	1.25051	5.71086	0.695479	1.25051	1.25051	0.141
T2	4.03405	10.7714	7.95441	4.59243	2.36226	1.25051	5.15137	63.8588	25.0652	105.658	51.6716	9.07952	0.695479	6.83152	0.141	3.47623	8.51669	1.25051
Plasma SOD	SO1	SO2	SO3	SO4	SO5	SO6	CPB1	CPB2	CPB3	CPB4	CPB5	CPB6	MEL1	MEL2	MEL3	MEL4	MEL5	MEL6
T0	21.775	30.9875	10.05	26.5208	31.5458	17.5875	21.4958	26.5208	20.3792	24.8458	17.5875	21.2167	20.3792	34.6167	32.1042	18.9833	24.5667	14.7958
T1	35.7333	34.0583	27.6375	33.2208	29.5917	23.1708	17.0292	11.725	17.5875	16.1917	14.2375	15.075	39.9208	35.4542	20.6583	17.3083	27.0792	13.6792
T2	34.6167	36.0125	25.4042	26.5208	39.0833	16.4708	15.9125	16.4708	13.6792	13.9583	12.0042	14.7958	20.6583	22.8917	39.9208	18.1458	36.2917	17.3083
Plasma GSH-Px	SO1	SO2	SO3	SO4	SO5	SO6	CPB1	CPB2	CPB3	CPB4	CPB5	CPB6	MEL1	MEL2	MEL3	MEL4	MEL5	MEL6
T0	841.026	902.564	825.641	666.667	871.795	569.231	1107.69	810	900	785	1175	1145	1230.77	1169.23	1287.18	1292.31	1200	1287.18
T1	917.949	841.026	1246.15	728.205	969.231	958.974	451.282	610	740	955	720	710	1035.9	969.231	1179.49	938.462	784.615	897.436
T2	871.795	964.103	543.59	753.846	846.154	651.282	938.462	645	905	925	650	755	1302.56	1061.54	1025.64	1061.54	1189.74	1174.36
Plasma MDA	SO1	SO2	SO3	SO4	SO5	SO6	CPB1	CPB2	CPB3	CPB4	CPB5	CPB6	MEL1	MEL2	MEL3	MEL4	MEL5	MEL6
T0	4.85714	4.28571	4.85714	3.14286	4.85714	4.57143	4	4	4.85714	4.85714	4.57143	8.85714	8.57143	4.28571	5.71429	4.57143	5.14286	4.57143
T1	4.28571	6.57143	4.28571	4.28571	4.28571	6.57143	6.28571	13.1429	8.28571	16.5714	9.71429	7.42857	10.5714	5.42857	8.28571	6.57143	4.28571	6.57143
T2	4.85714	4.28571	3.14286	5.14286	4.85714	4	9.42857	10.2857	11.4286	16.2857	12	18.5714	14.5714	7.42857	7.42857	8.85714	7.14286	8
Plasma CK-MB	SO1	SO2	SO3	SO4	SO5	SO6	CPB1	CPB2	CPB3	CPB4	CPB5	CPB6	MEL1	MEL2	MEL3	MEL4	MEL5	MEL6
T0	13.152	18.836	23.609	17.801	10.937	20.697	28.504	26.195	28.504	25.673	25.558	14.73	40.469	8.74	10.786	26.853	13.525	32.271
T1	14.407	13.285	21.141	19.983	17.198	25.495	749.534	1114.75	749.534	697.36	690.695	1073.58	54.361	40.296	116.181	56.611	26.824	53.58
T2	19.234	22.478	13.672	13.992	13.743	18.097	2753.07	2066.03	2753.07	1374.7	958.693	1891.59	289.947	41.775	339.678	299.255	294.952	257.704
Plasma cTnT	SO1	SO2	SO3	SO4	SO5	SO6	CPB1	CPB2	CPB3	CPB4	CPB5	CPB6	MEL1	MEL2	MEL3	MEL4	MEL5	MEL6
T0	27.9402	17.8234	19.083	30.4837	22.2383	18.453	34.3095	26.6706	26.0364	30.4837	22.8704	21.6065	27.9402	17.1941	16.5652	43.2861	43.93	24.1357
T1	28.5755	32.395	23.5029	26.6706	19.083	13.4259	399.744	456.979	447.741	680.391	619.695	633.354	121.031	128.59	137.58	625.149	626.97	66.0328
T2	23.5029	15.3084	20.3441	25.4025	26.0364	15.9366	588.137	835.937	841.878	934.564	844.852	827.051	194.224	630.616	621.512	700.028	717.93	276.586

## Sheet: Figs. 3 A.B.D.E.
Figure 3A ROS	SO	CPB	MEL
	31.7643	35.885	31.7643
	21.4753	37.7483	21.4753
	19.225	37.022	19.225
	15.0913	37.623	20.6557
	14.0017	37.244	26.9293
	13.7503	46.7653	24.8577
Figure 3B TUNEL	SO	CPB	MEL
	1.17491	3.80953	1.54917
	0.842221	5.55826	1.4688
	1.70336	5.01973	2.64302
	1.01972	12.9012	1.38148
	1.29302	4.3037	1.25859
	0.754886	9.3523	1.55063
Figure 3D BAX	SO	CPB	MEL
	1	1.49937	0.984989
	1	1.66104	0.967824
	1	1.85073	0.737401
	1	1.85313	0.608005
	1	2.076	0.322874
	1	1.50365	0.810671
Figure 3D BCL-2	SO	CPB	MEL
	1	0.293671	2.06902
	1	0.591869	0.859033
	1	0.5007	1.27357
	1	0.442935	0.574997
	1	0.579979	0.892731
	1	0.482945	0.709846
Figure 3D Cyto-C	SO	CPB	MEL
	1	4.30873	3.43585
	1	2.17375	1.1879
	1	4.54267	2.68199
	1	3.24245	2.3244
	1	5.7646	2.32486
	1	2.12502	1.46705
Figure 3D Cleaved Caspase-9	SO	CPB	MEL
	1	1.35999	1.23897
	1	3.94812	1.65844
	1	2.20731	1.98836
	1	1.36865	0.749819
	1	1.98451	1.44703
	1	4.4845	0.510769
Figure 3E AIF	SO	CPB	MEL
	25.0757	41.5143	34.82
	31.8873	37.4707	26.5707
	30.3043	31.9077	26.377
	31.867	34.315	24.3483
	32.3587	32.203	32.9373
	30.4337	38.9977	25.8563

## Sheet: Figs. 4
Figure 4 p-AKT/AKT	SO	CPB	MEL
	1	0.195472	0.471919
	1	0.205398	0.53178
	1	0.229392	0.592889
	1	0.160808	0.599603
	1	0.168167	0.730116
	1	0.756815	1.30044
Figure 4 p-STAT3/STAT3	SO	CPB	MEL
	1	6.43705	37.3549
	1	5.03611	33.0072
	1	3.66538	2.15746
	1	4.27041	26.5209
	1	3.29793	42.387
	1	2.73416	7.85807

## Sheet: Figs. 5 B.C.
Figure 5B LC3	SO	CPB	MEL
	1	3.23106	1.55774
	1	2.3686	0.470764
	1	2.41452	1.08035
	1	2.40842	1.48721
	1	2.1844	1.76871
	1	3.94903	1.15214
Figure 5B P62	SO	CPB	MEL
	1	0.426419	2.58853
	1	0.518042	0.959404
	1	0.128832	1.16776
	1	0.219156	0.854856
	1	0.43388	0.936971
	1	0.410935	1.47859
Figure 5C p-mTOR/mTOR	SO	CPB	MEL
	1	0.135533	1.98865
	1	0.542308	1.84797
	1	0.163691	1.35707
	1	0.373671	1.04429
	1	0.309518	2.18052
	1	0.105653	0.975984
